# Supplementary material for: Beyond Attributable Burden: Estimating the Avoidable Burden of Disease Associated with Household Air Pollution
Source: PLoS One. 2016 Mar 16;11(3):e0149669. doi: 10.1371/journal.pone.0149669 (PMC4794200; doi:10.1371/journal.pone.0149669)
Supplement: S2 Appendix — (XLSX) [file pone.0149669.s002.xlsx]

## Sheet: Sheet1
						specific inclusion criterion
Author	Date	Title	measure	outcome	included in study estimates	time use budget	multiple locations in home?	stove type	reason for exclusion	notes	Deals with HAP due to cooking	Keyword
Ahuja et al.	1987	“Thermal Performance and Emission Characteristics of Unvented Biomass-Burning Cookstoves…	emissions	CO &TSP	no	no	no	no	method only		yes	emission	doi:10.1016/0144-4565(87)90039-4.
Albalak et al.	2001	“Indoor Respirable Particulate Matter Concentrations from an Open Fire, Improved Cookstove, and LPG/open Fire Combination…	concentration	PM3.5	no	no	no	yes	no measurements in multiple locations		yes	concentration	doi:10.1021/es001940m.
Balakrishnan et al.	2002	“Daily Average Exposures to Respirable Particulate Matter from Combustion of Biomass Fuels in Rural Households of Southern India	concentration	respirable particulate matter	no	yes	yes	yes	no size for particulate matter reported		yes	exposure
Balakrishnan et al.	2004	Exposure Assessment for Respirable Particulates Associated with Household Fuel Use in Rural Districts of Andhra Pradesh, India	concentration	respirable particulate matter	yes	yes	yes	yes			yes	exposure	doi:10.1038/sj.jea.7500354.
Balakrishnan et al.	2013	“State and National Household Concentrations of PM2.5 from Solid Cookfuel Use	concentration	PM2.5	yes	no	yes	yes		fuel type	yes	concentration	doi:10.1186/1476-069X-12-77.
Balakrishnan et al.	2013	“Modeling National Average Household Concentrations of PM2.5 from Solid Cookfuel Use for the Global Burden of Disease 2010	concentration	PM2.5	yes	no	yes	yes		fuel type	yes	concentration	doi:10.1186/1476-069X-12-77.
Biran et al.	2007	Smoke and Malaria: Are Interventions to Reduce Exposure to Indoor Air Pollution Likely to Increase Exposure to Mosquitoes?	NA	malaria	no	no	no	no	health impact paper		yes	exposure	doi:10.1016/j.trstmh.2007.07.010.
Bonjour et al.	2013	Solid Fuel Use for Household Cooking: Country and Regional Estimates for 1980-2010	NA	% population using	no	no	no	no	no concentration estimates reported	fuel type	yes	estimate	doi:10.1289/ehp.1205987.
Clark et al.	2013	Health and Household Air Pollution from Solid Fuel Use	concentration & exposure	PM10, PM4, PM2.5	no	no	no	yes	does not report multiple locations		yes	exposure	doi:10.1289/ehp.1206429.
Ezzati and Kamman	2001	Indoor Air Pollution from Biomass Combustion and Acute Respiratory Infections in Kenya	NA	health outcomes	no	no	nr*	yes	health impact paper		yes	exposure
Ezzati and Kammen	2001	Quantifying the Effects of Exposure to Indoor Air Pollution from Biomass Combustion on Acute Respiratory Infections in Developing Countries	NA	health outcomes	no	nr	nr	yes	health impact paper		yes	exposure
Ezzati et al.	2000	The Contributions of Emissions and Spatial Microenvironments to Exposure to Indoor Air Pollution from Biomass Combustion in Kenya	concentration	PM10	yes	yes	yes	yes			yes	emission
Ezzati et al.	2002	Review The Health Impacts of Exposure to Indoor Air Pollution from Solid Fuels in Developing Countries	expoure concentration	PM10	no	nr	nr	yes	no time use reported-did use paper from same study that reported time use and PM concentrations		yes	exposure
Jetter and Kariher	2009	Solid Fuel Household Cook Stoves: Characterization of Performance and Emissions	emissions	CO, PM2.5	no	no	no	yes	reports emissions		yes	emission
Johnson et al.	2011	Modeling Indoor Air Pollution from Cookstove Emissions in Developing Countries Using a Monte Carlo Single-Box Model	emissions	PM2.5	no	no	no	yes	reports emissions		yes	emission	doi:10.1016/j.atmosenv.2011.03.044.
Joon et al.	2011	Predicting Exposure Levels of Respirable Particulate Matter (PM2.5) and Carbon Monoxide for the Cook from Combustion of Cooking Fuels	concentration	PM2.5	no	nr	nr	yes	time activity budget and measurements in multiple locations not reported		yes	emission
MacCarty et al.	2010	Fuel Use and Emissions Performance of Fifty Cooking Stoves in the Laboratory and Related Benchmarks of Performance	emissions	CO, PM2.5	no	no	no	yes	reports emissions		yes	emission	doi:10.1016/j.esd.2010.06.002.
McCraken et al.	2007	Chimney Stove Intervention to Reduce Long-Term Wood Smoke Exposure Lowers Blood Pressure among Guatemalan Women	personal exposure	PM2.5	no	no	no	yes	no time use, measured personal exposure	only two types	yes	exposure	doi:10.1289/ehp.9888.
Meng et al.	2010	Determinants of Indoor and Personal Exposure to PM2.5 of Indoor and Outdoor Origin during the RIOPA Study	personal exposure	PM2.5	no	nr	no	no	no estimates provided		yes	exposure	doi:10.1016/j.atmosenv.2009.07.066.Determinants.
Pokhrel et al.	2005	Case-Control Study of Indoor Cooking Smoke Exposure and Cataract in Nepal and India	NA	cataract	no	no	no	no	health impact paper		yes	exposure	doi:10.1093/ije/dyi015.
Roden et al.	2009	Laboratory and Field Investigations of Particulate and Carbon Monoxide Emissions from Traditional and Improved Cookstoves	emissions	CO, PM	no	no	no	yes	reports emissions		yes	emission	doi:10.1016/j.atmosenv.2008.05.041.
Siddiqui et al.	2009	Indoor Carbon Monoxide and PM2.5 Concentrations by Cooking Fuels in Pakistan	concentration	CO, PM2.5	no	no	no	yes	not measured in multiple locations	fuel type	yes	concentration	doi:10.1111/j.1600-0668.2008.00563.x.
Smith et al.	2010	Personal Child and Mother Carbon Monoxide Exposures and Kitchen Levels	personal exposure	CO	no	no	no	yes	reports CO	only two types	yes	exposure	doi:10.1038/jes.2009.30.
Sukhosale et al.	2013	Indoor Air Pollution from Biomass Combustion and Its Adverse Health Effects in Central India	usage	health outcomes	no	no	no	no	health impact paper	fuel type	yes	exposure	doi:10.4103/0970-0218.116353.
Wilkinson et al.	2009	Public Health Benefits of Strategies to Reduce Greenhouse-Gas Emissions	NA	DALYs, deaths	no	no	no	no	modeled multi-interventions		yes	emission	doi:10.1016/S0140-6736(09)61713-X.
Yadama et al.	2012	Social, Economic, and Resource Predictors of Variability in Household Air Pollution from Cookstove Emissions	NA	odds of ownership	no	no	no	no	health impact paper		yes	emission	doi:10.1371/journal.pone.0046381.
Zhang et al.	2000	Greenhouse Gases and Other Airborne Pollutants from Household Stoves in China: A Database for Emission Factors	emissions	CO2, CO, CH4, TSP,NO4,SO2,K	no	no	no	no	reports emissions		yes	emission	doi:10.1016/S1352-2310(99)00450-1.
* - nr = not reported, though it was used in the model
